# Supplementary material for: Laser dye doped nanoparticles for highly photostable optical nanoamplifiers
Source: Royal Society of Chemistry journal article supplement (doi:10.1039/c2ra22314g), 2012-01-01
Supplement: c2ra22314g.pdf [file c2ra22314g.pdf]

## SUPPORTING INFORMATIONS

### Laser Dye Doped Nanoparticles for Highly Photostable Optical Nanoamplifiers

Angelo Monguzzi,\* Michel Frigoli, Chantal Larpent, and Francesco Meinardi

In the following are reported additional results of the Pyr567-NP particles set studied.

**Table S1** Encapsulation of PM567 in the nanoparticles

| Entry | Size NP<br>nm | NP<br>content[a] | [C]<br>mmol.L <sup>-1</sup> | dye<br>added<br>μmol / g | dye<br>entrapped<br>μmol / g | dye<br>entrapped<br>mmol / L | Dye / NP | Dye<br>Concentration<br>solid state<br>(dye cm <sup>-3</sup> ) | PLQY<br>(±5%) |
|-------|---------------|------------------|-----------------------------|--------------------------|------------------------------|------------------------------|----------|----------------------------------------------------------------|---------------|
| 1     | 18            | 8.89             | 5.44                        | 5.44                     | 4.83                         | 4.83                         | 8.89     | 2.53×10 <sup>18</sup>                                          | 0.8118        |
| 2     | 18            | 17.47            | 10.88                       | 10.88                    | 9.50                         | 9.50                         | 17.47    | 4.06×10 <sup>18</sup>                                          | 0.8437        |
| 3     | 18            | 29.20            | 21.77                       | 21.77                    | 15.89                        | 15.89                        | 29.20    | 8.29×10 <sup>18</sup>                                          | 0.7922        |
| 4     | 27            | 37.29            | 5.44                        | 5.44                     | 6.18                         | 6.18                         | 37.29    | 3.62×10 <sup>18</sup>                                          | 0.8035        |
| 5     | 27            | 60.74            | 10.88                       | 10.88                    | 10.07                        | 10.07                        | 60.74    | 5.90×10 <sup>18</sup>                                          | 0.8313        |
| 6     | 27            | 87.90            | 21.76                       | 21.76                    | 14.57                        | 14.57                        | 87.90    | 8.53×10 <sup>18</sup>                                          | 0.8105        |

[a] determined from the value of absorbance at 523 nm ( $\epsilon = 86000 \text{ mol}^{-1}\cdot\text{L}\cdot\text{cm}^{-1}$ ) for PM567-doped NPs (diluted in pure water 20 times) and assuming a NP average of 18 or 27 nm and a density of 1.

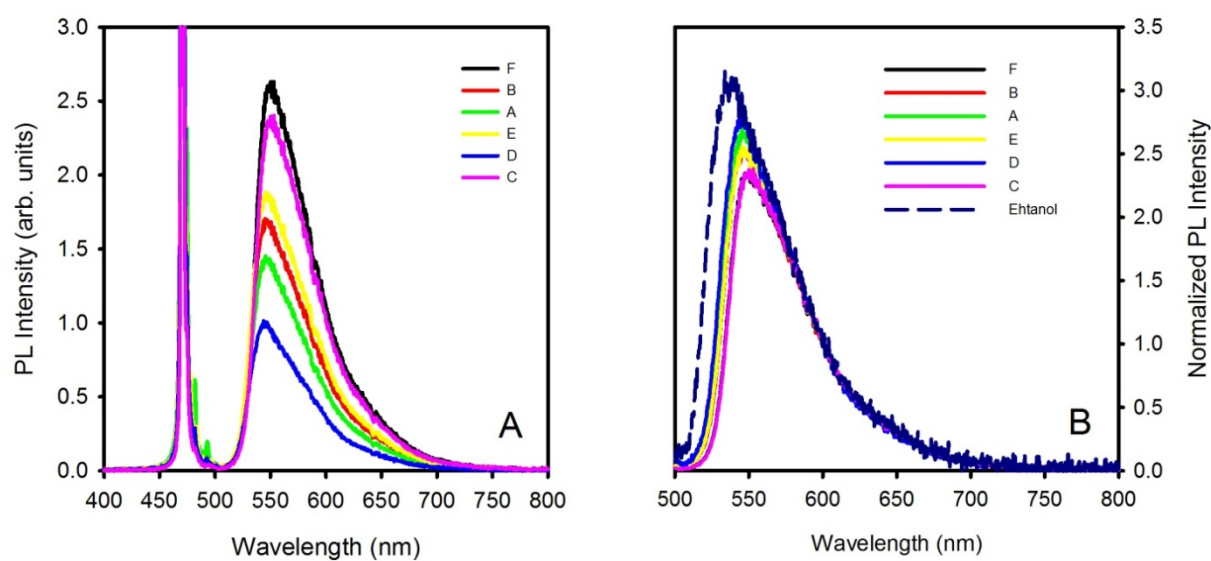

**Fig. S2** (left) PL spectrum of Py567 doped NPs in aqueous suspension, under 473 nm CW excitation (10 mW) in a 1 mm optical path cuvette. (right) NP emission spectra compared to solution PL (red line), normalized to enlighten the self-absorption effect

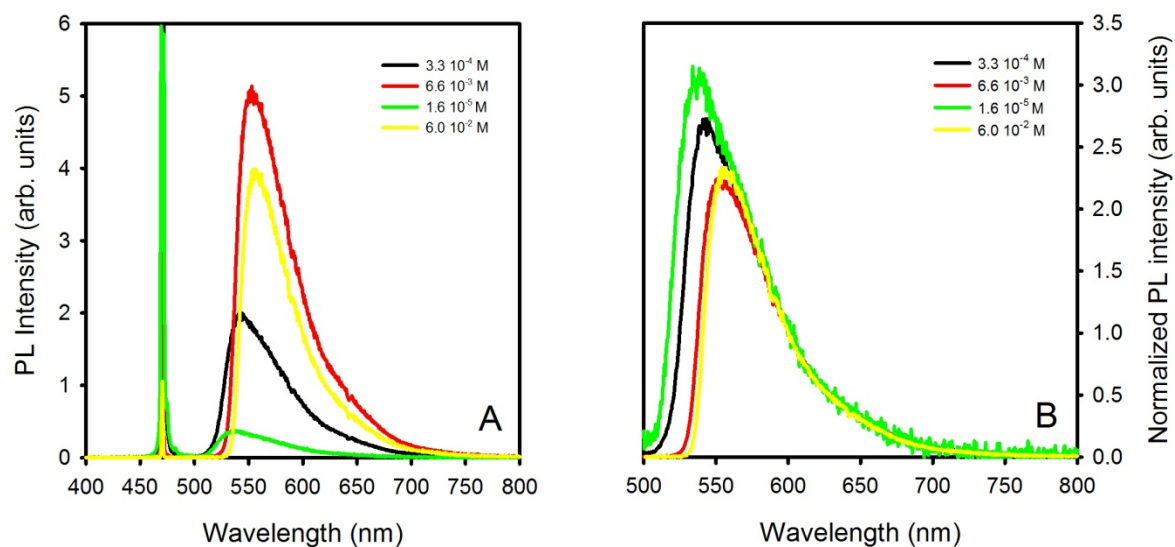

**Fig. S3** (left) PL spectrum of Py567 solution in ethanol at different concentrations, under 473 nm CW excitation (10 mW) in 1 mm optical path cuvette. (right) Normalized PL spectra.

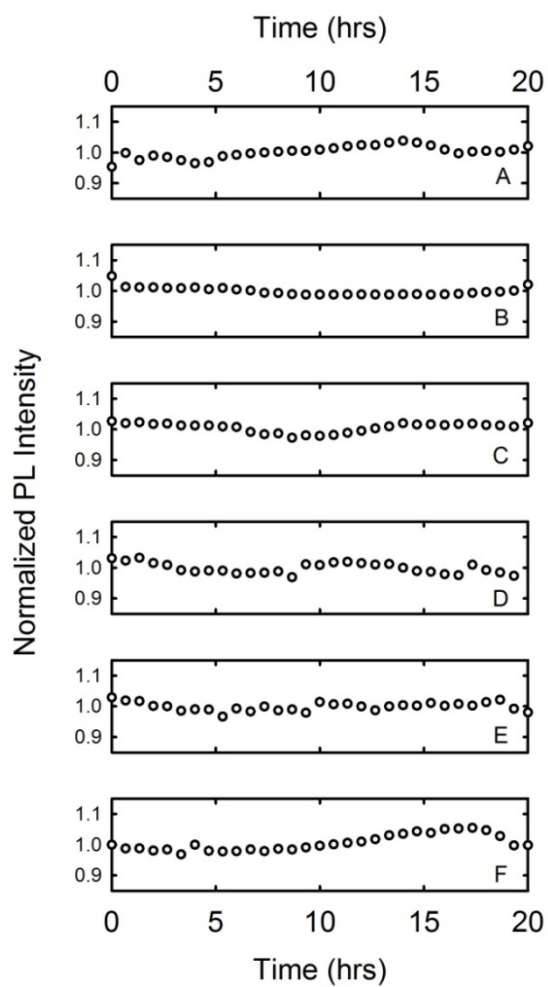

**Fig. S4** PL spectrum of Py567 doped NP series as a function of time, under air exposition and  $31.25 \text{ mW /cm}^{-2}$  CW laser excitation at 532 nm.

**Preparation of rubrene doped NPs and rubrene nanocrystals:** 40  $\mu\text{L}$  of a DCM solution containing 0.0108  $\text{mol.L}^{-1}$  of rubrene were added to 2 mL of an aqueous suspension of the nanoparticles (2% wt; 15% DTAB) or to 2 mL of 15 wt % DTAB aqueous solution. The resulting mixtures were stirred at room temperature for 3 h in a capped sample tube. The tube was then uncapped and the solution was stirred for an additional 12 h to allow evaporation of the DCM. The solutions were filtered through a 0.2  $\mu\text{m}$  MF-Millipore<sup>TM</sup> filter before use. Absorption spectra were recorded for solutions diluted 20 times in water.

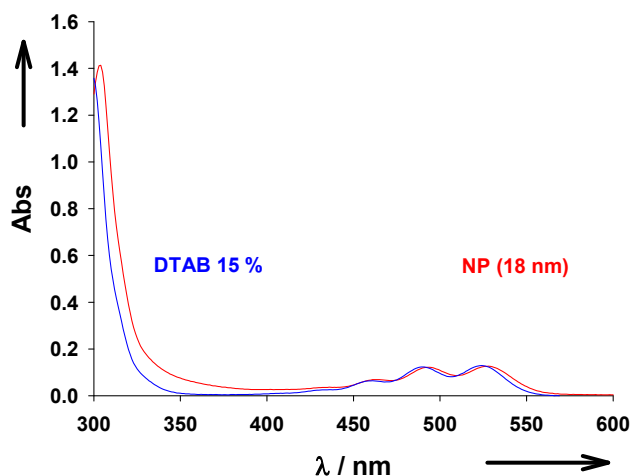

**Fig. S5** Absorption spectra of Rubrene doped NPs in red (18 nm) containing 20 rubrene per particle and rubrene nanocrystals in blue.

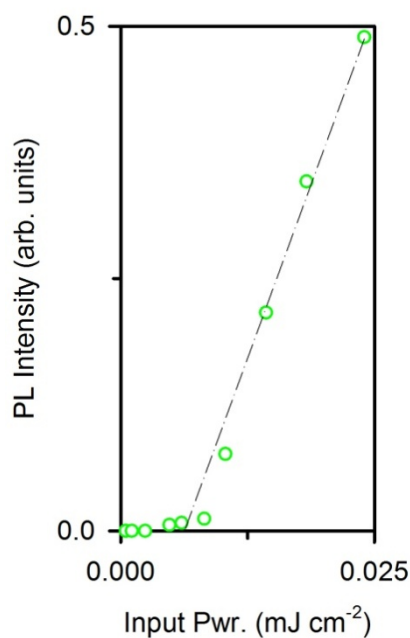

**Fig. S6** PL intensity as a function of the excitation pulse energy of Film-Al sample (green circles)
